# Supplementary material for: Toll-like receptor 2 ligand and interferon-γ suppress anti-tumor T cell responses by enhancing the immunosuppressive activity of monocytic myeloid-derived suppressor cells
Source: PubMed Central journal article supplement — Oncoimmunology. 2017 Sep 21;7(1):e1373231. doi: 10.1080/2162402X.2017.1373231 (PMC5739553; doi:10.1080/2162402x.2017.1373231), 2017-09-21
Supplement: koni-07-01-1373231-s001.pdf [file koni-07-01-1373231-s001.pdf]

**Toll-like receptor 2 ligand and interferon- $\gamma$  suppress anti-tumor T cell responses by enhancing the immunosuppressive activity of monocytic myeloid-derived suppressor cells**

Hiroaki Shime<sup>1,2</sup>, Akira Maruyama<sup>1</sup>, Sumito Yoshida<sup>1</sup>, Yohei Takeda<sup>1</sup>, Misako Matsumoto<sup>1</sup>, and Tsukasa Seya<sup>1</sup>

**Supplemental Figures and table**

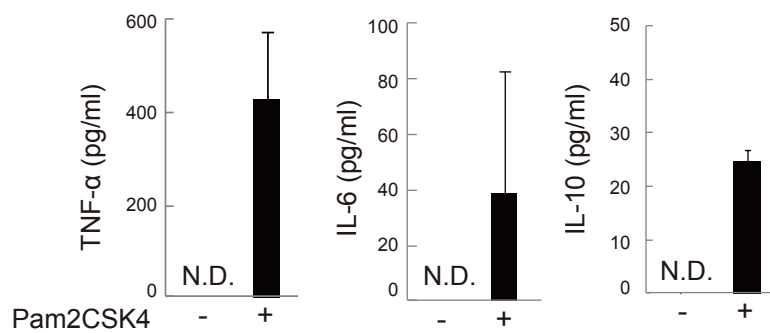

**Supplementary Figure 1. Cytokine production by MDSCs in response to Pam2CSK4.**

CD11b<sup>+</sup>Gr1<sup>+</sup> MDSCs ( $1 \times 10^5$ ) were incubated with Pam2CSK4 for 24 h. The concentration of TNF- $\alpha$ , IL-6, and IL-10 in the conditioned media was determined by ELISA. Mean  $\pm$  SD were shown. n=3, N.D., not detected..

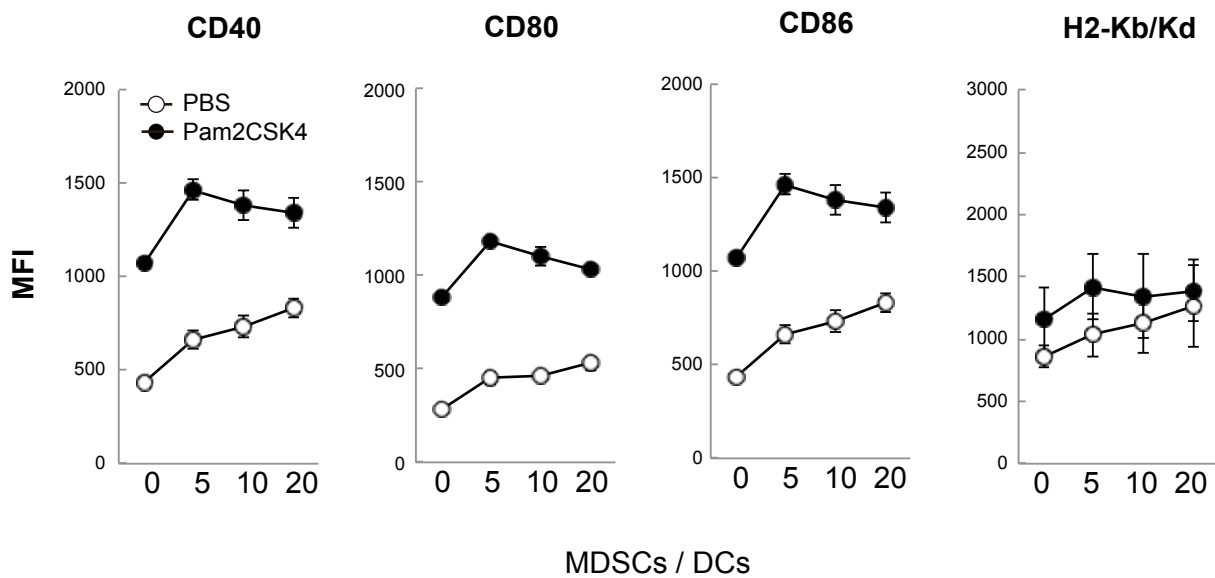

**Supplementary Figure 2. MDSCs do not inhibit maturation of DCs.** CD11c<sup>+</sup> DCs were cocultured with MDSCs for 3 days in the presence or absence of Pam2CSK4. Expression levels of surface molecules CD40, CD80, CD86, and H2-K<sup>b</sup>/K<sup>d</sup>, were analyzed by flow cytometry. Each dot represents mean  $\pm$  SD. n=3. MFI, mean fluorescence intensity.

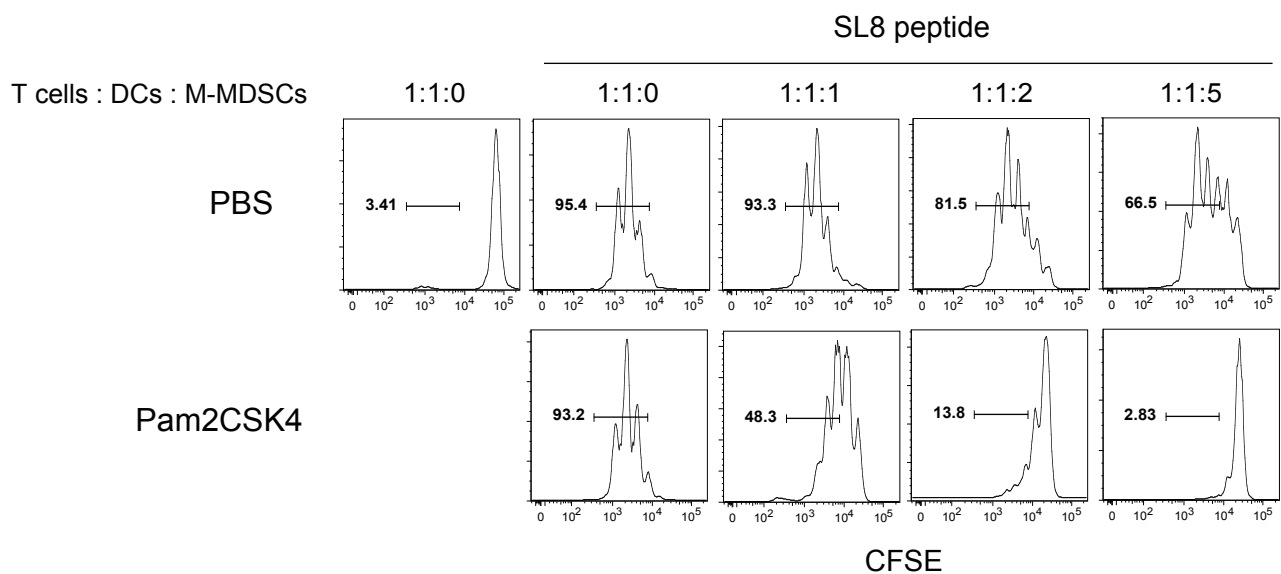

**Supplementary Figure 3. Pam2CSK4 enhances the immunosuppressive activity of M-MDSCs isolated from mice bearing LLC-OVA tumors.** M-MDSCs ( $1 \times 10^5$ ) isolated from LLC-OVA-implanted mice were co-cultured with CFSE-labeled CD8<sup>+</sup> OT-I T cells ( $0.5 \times 10^5$ ) and CD11c<sup>+</sup> DCs ( $0.5 \times 10^5$ ) in the presence of 100 nM Pam2CSK4 and 50 nM SL8 peptide. After 3 days, CFSE fluorescence of CD8 $\alpha^+$ TCR $\nu\beta$ 5.1/5.2<sup>+</sup> cells was analyzed by flow cytometry.

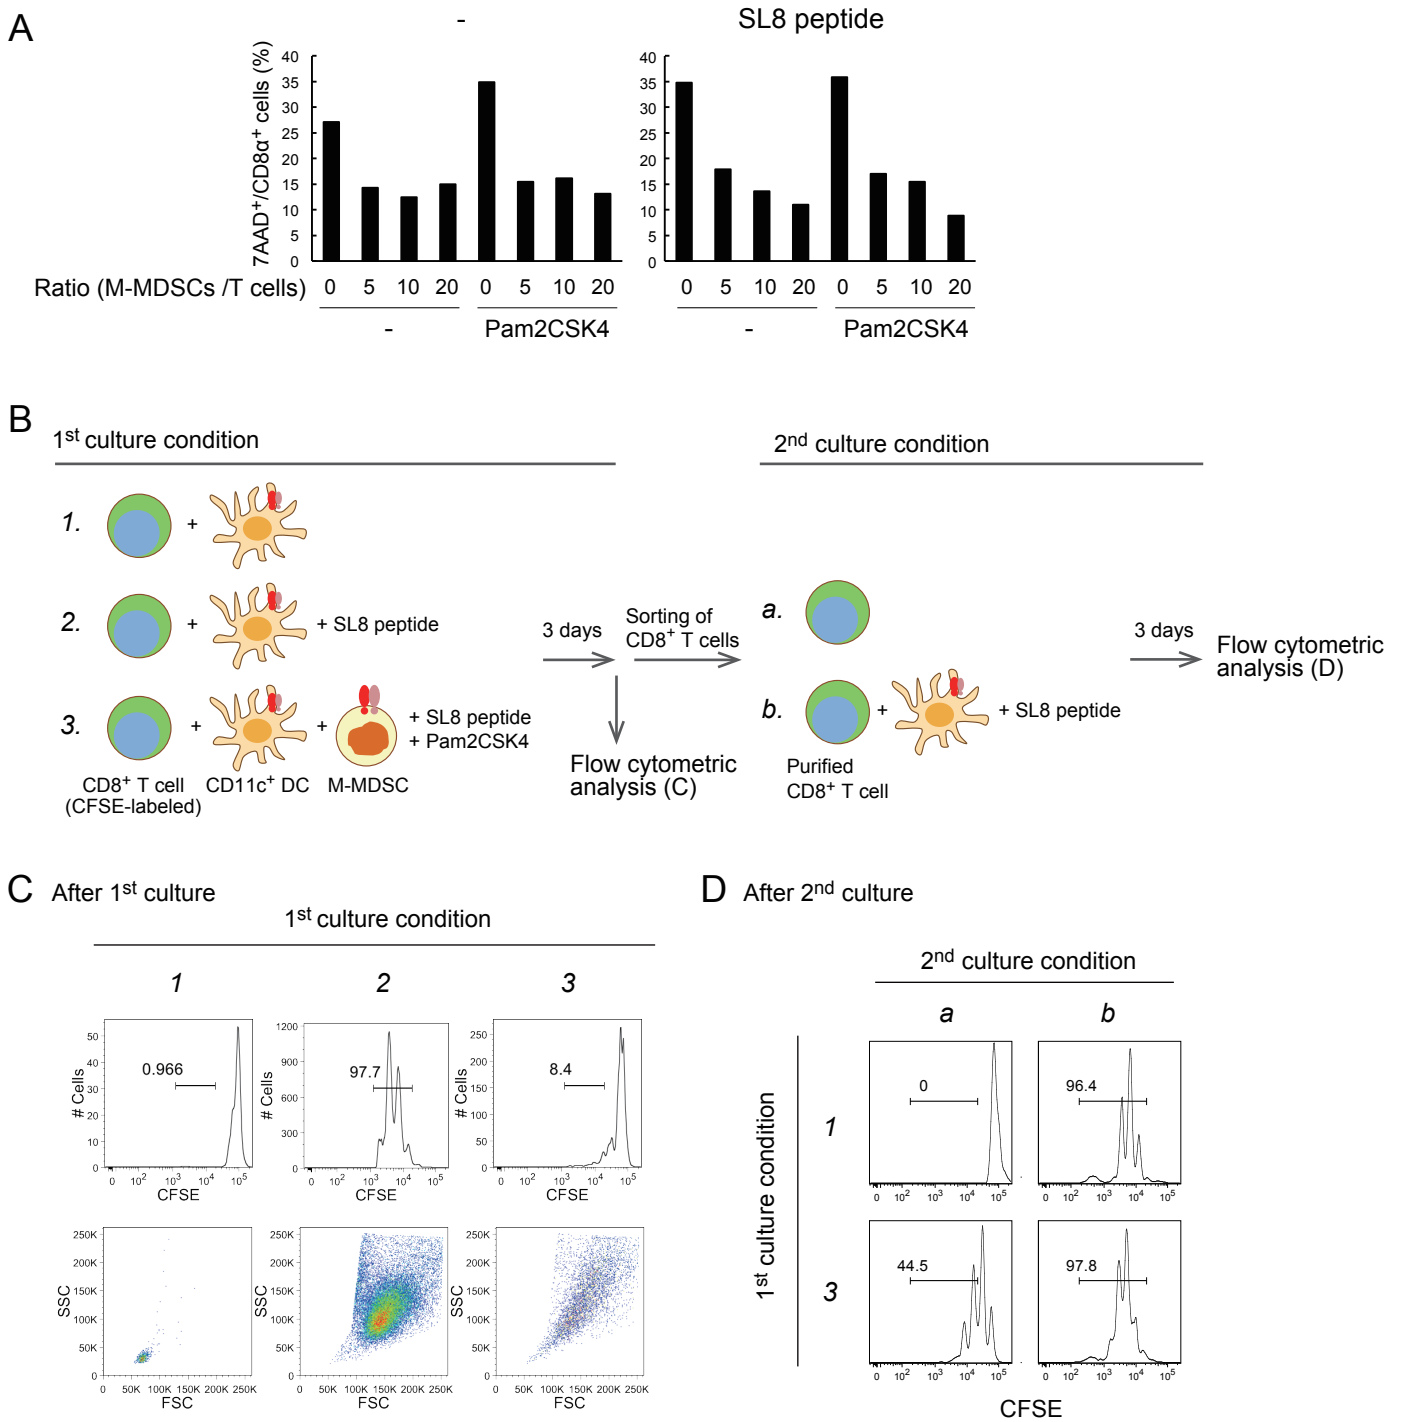

**Supplementary Figure 4. Proliferation of CD8<sup>+</sup> T cells is reversibly inhibited by Pam2CSK4-activated M-MDSCs.** (A) Viability of CD8<sup>+</sup> T cells after coculture with M-MDSCs and Pam2CSK4 was determined by 7AAD staining and the following flow cytometric analysis. (B, C, D) CFSE-labeled CD8<sup>+</sup> T cells were cultured with CD11c<sup>+</sup> DCs in the presence or absence of 50 nM SL8 peptide, M-MDSCs, or Pam2CSK4 for 3 days (condition 1-3 of 1<sup>st</sup> culture). CFSE fluorescence (upper) and forward and side scatter (lower) of total CD8 $\alpha$ <sup>+</sup>TCR $\nu$ 5.1/5.2<sup>+</sup> T cells were shown (C). Single cell-sorted CD8 $\alpha$ <sup>+</sup>TCR $\nu$ 5.1/5.2<sup>+</sup> cells ( $1 \times 10^5$ ) were cultured with or without CD11c<sup>+</sup> DCs ( $0.5 \times 10^5$ ) and 50 nM SL8 peptide for 3 days (condition a or b of 2<sup>nd</sup> culture), then their CFSE fluorescence was analyzed (D).

T cells : DCs = 1 : 1

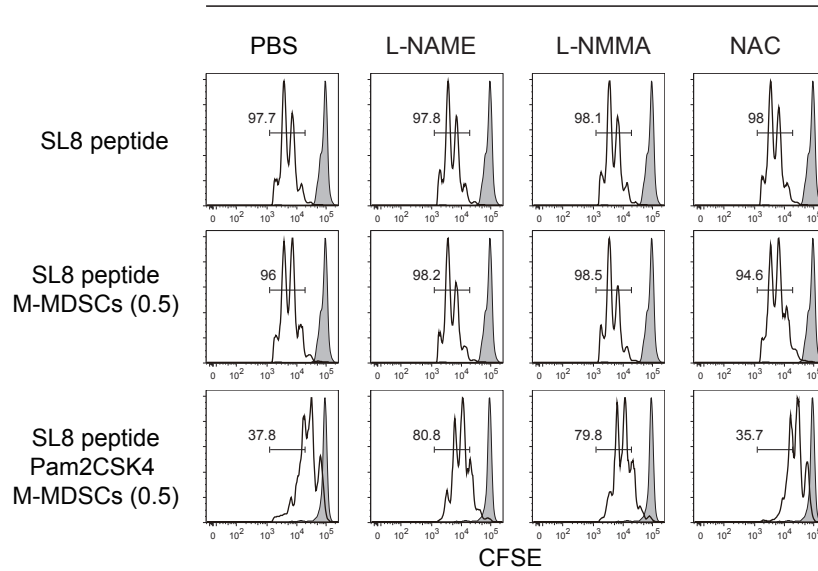

**Supplementary Figure 5. iNOS inhibitors restore T cell proliferation inhibited by Pam2CSK4-activated M-MDSCs.** CFSE-labeled CD8<sup>+</sup> T cells ( $0.5 \times 10^5$ ) were co-cultured with CD11c<sup>+</sup> DCs ( $0.5 \times 10^5$ ) and M-MDSCs ( $0.25 \times 10^5$ ) in the presence of 50 nM SL8 peptide with or without 100 nM Pam2CSK4. L-NAME (1 mM), L-NMMA (0.1 mM), or NAC (1 mM) were added to the cultures. After 3 days, CFSE fluorescence of CD8 $\alpha$ <sup>+</sup>TCR $\beta$ 5.1/5.2<sup>+</sup> cells was analyzed by flow cytometry. Gray histogram represent T cells cocultured without SL8 peptide.

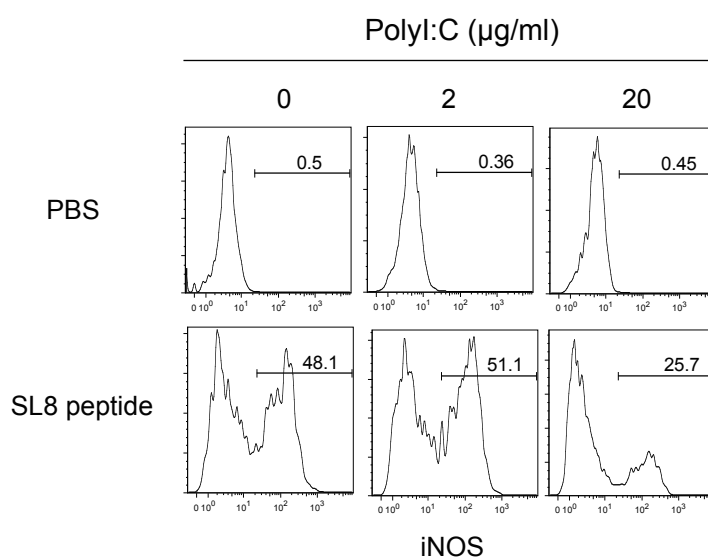

**Supplementary Figure 6. PolyI:C does not induce iNOS expression in F4/80<sup>+</sup> macrophages derived from M-MDSCs.** M-MDSCs ( $1 \times 10^5$ ) isolated from EG7 tumor-bearing mice were co-cultured with CD8<sup>+</sup> OT-I T cells ( $0.5 \times 10^5$ ) in the presence of polyI:C and 50 nM SL8 peptide. After 24 h, intracellular iNOS expression in CD11b<sup>+</sup>F4/80<sup>+</sup> cells was analyzed by flow cytometry.

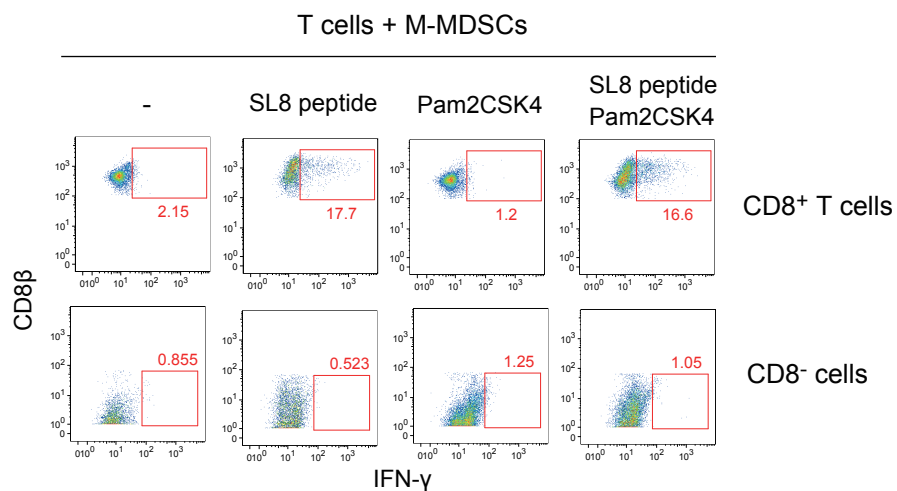

**Supplementary Figure 7. CD8<sup>+</sup> T cells produce IFN- $\gamma$  in the cocultures with M-MDSCs and antigen peptide.** CD8<sup>+</sup> T cells ( $0.5 \times 10^5$ ) and M-MDSCs ( $1 \times 10^6$ ) were cocultured in the presence of 50 nM SL8 peptide and/or 100 nM Pam2CSK4. After 24 h, cells were further cultured for 5 h in the presence of 10  $\mu$ g/ml Brefeldin A and then IFN- $\gamma$  production in CD8<sup>+</sup> T cells was analyzed by intracellular cytokine staining.



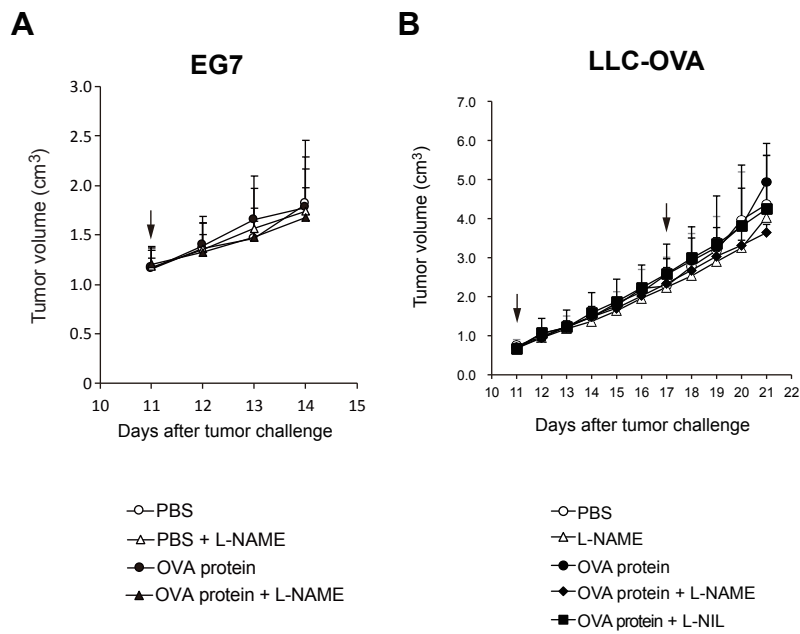

**Supplementary Figure 8. Treatment with OVA protein, L-NAME, and L-NIL does not affect tumor growth.** B6 mice bearing EG7 tumors (A) or LLC-OVA tumors (B and C) were injected s.c. with PBS, 100  $\mu$ g OVA protein, 25 nmol Pam2CSK4 on days indicated by arrows. Mice were daily injected i.p. with PBS, L-NAME (2 mg), or L-NIL (0.5 mg) from day 11 (A and B) or day 13 (C). n=3-4. Data represent mean  $\pm$  SD.

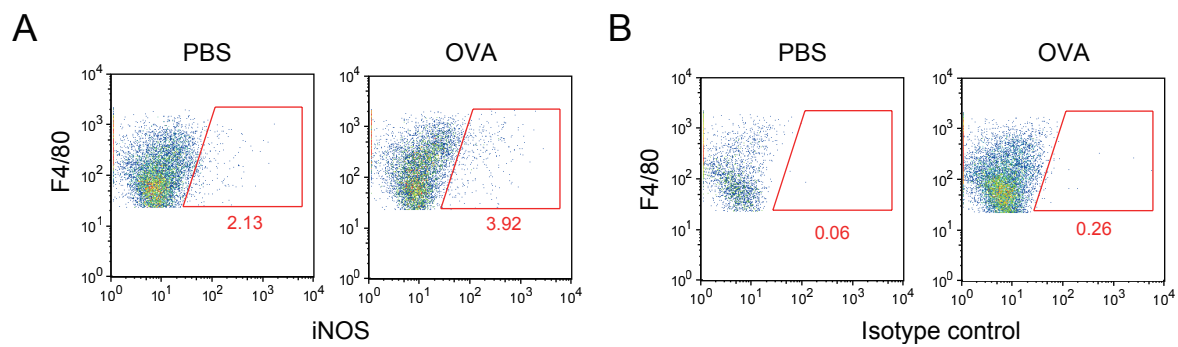

**Supplementary Figure 9. Monotherapy with OVA protein does not induce iNOS expression in tumor-infiltrating macrophages.** EG7 tumor-bearing mice were injected s.c. with PBS or 100  $\mu$ g OVA protein. After 24 hours, single cell suspension of tumors were stained with APC-anti-F4/80 Ab and PE-anti-iNOS Ab (A) or PE-isotype control Ab (B) and analyzed by flow cytometry.

**Supplementary Table 1. Real-time PCR primer sequences (5' to 3' )**

| <b>Gene</b>                    | <b>Forward primer</b>       | <b>Reverse primer</b>    |
|--------------------------------|-----------------------------|--------------------------|
| <i>Gapdh</i>                   | GCCTGGAGAAACCTGCCA          | CCCTCAGATGCCTGCTTCA      |
| <i>IL-10</i>                   | GGCGCTGTCATCGATTTCTC        | TGCTCCACTGCCTTGCTCTTA    |
| <i>TNF-<math>\alpha</math></i> | AGGGATGAGAAGTTCCCAAATG      | GCTTGTCACTCGAATTTTGAGAAG |
| <i>IL-6</i>                    | GTGCATCATCGTTGTTTCATAACAATC | CTGGGAAATCGTGGAATGAG     |
| <i>Bcl2l1</i>                  | CACTGTGCGTGGA AA GCATA      | AAAGTGTCCCAGCCGCC        |
| <i>Bcl3</i>                    | CGCAGCCGCAGGGTCATTGAT       | TTGGCGAGGAC TGGAGGCCA    |
| <i>Ccnd1</i>                   | CACAACG CACTTTCTTTCCA       | GACCAGCCTCTTCCTCCAC      |
| <i>Ccnd2</i>                   | CGCTCTGTGCGCTACCGACTT       | GCCCACAGATGGC TGCTCCC    |
| <i>Ier3</i>                    | TCCACCGCGCGTTTTGAACACT      | GTAGCTGGCGCCGGACCACTC    |
| <i>c-Myc</i>                   | TGAGCCCCTAGTGCTGCAT         | AGCCCGACTCCGACCTCTT      |
